# Supplementary material for: Exploring potential influencing factors of inadherence to specialist aftercare and long-term medication in patients with acromegaly
Source: PubMed Central journal article supplement (PMC11289155; doi:10.1007/s11102-024-01400-4), 2024-05-24
Supplement: 11102_2024_1400_MOESM1_ESM.pdf [file 11102_2024_1400_MOESM1_ESM.pdf]

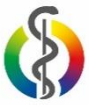

**Universitätsmedizin Essen**

Universitätsklinikum  
Klinik für Neurochirurgie  
und Wirbelsäulen Chirurgie

**NB: Markings in red were added afterwards and indicate for which scales a mean score has been calculated.**

## Q1 -

# General questions about the person and life situation

Dear patient,

below you will find some questions about yourself and your life situation. Please answer all questions completely and do not omit any questions.

Thank you very much for your participation!

## 1. personal data

ID code (will be filled in by us)

Date

Age

Gender

- male       diverse  
 female

## 2. education

Highest school graduation:

- none  
 Lower secondary school diploma  
 Higher secondary school diploma  
 Specialized high school diploma  
 High school diploma

Do you have a completed apprenticeship?

- yes  
 no

Do you have a university graduation?

- yes  
 no

## 3. CURRENT living situation

I live:

- alone  
 alone with children  
 with my life partner  
 with my life partner and children  
 in a shared flat  
 with my parents  
 assisted

Marital status:

- single  
 living in partnership  
 married  
 divorced  
 widowed

## 4. physical data

Size (m)

Weight (kg)

Do you smoke? If yes, how much?

- Yes, \_\_\_\_\_ cigarettes/day  
 No

## 5. health insurance

How are you covered by health insurance?

- statutory health insurance  
 private health insurance  
     without civil servant allowance  
     with civil servant allowance

## 6. CURRENT professional situation

Occupation

Professional situation

- Full-time  
 Part-time  
 unemployed  
 Housewife / Househusband  
 Occupational disability pension  
 Early retirement  
 Pension

In shift work?

- yes  
 no

**6.1 If you are employed, are you currently on sick leave?**

- Yes, since \_\_\_\_/\_\_\_\_/\_\_\_\_ (day/month/year)  
 No

**6.2 If you have not yet retired, have you applied for a pension?**

- Yes  
 No

**6.3 Do you have a recognised degree of disability (e.g. by the pension office)?**

- Yes      If yes, what is the degree? \_\_\_\_\_%  
Has an upgrade been applied for?       Yes       No  
 No      If no, have you submitted a request?       Yes       No

## 7. treatment of acromegaly

**7.1 When were you diagnosed with acromegaly?**

\_\_\_\_\_/\_\_\_\_\_ (year/month if known)

**7.2 Have you had surgery on your GH-producing pituitary adenoma due to acromegaly?**

- Yes       No

**7.3 If yes, how often and when?**

1st OP    When?: \_\_\_\_/\_\_\_\_ (year/month if known)

2nd OP    When?: \_\_\_\_/\_\_\_\_ (year/month if known)

3rd OP    When?: \_\_\_\_/\_\_\_\_ (year/month if known)

**7.4 Have you ever received radiotherapy to the head?**

- Yes       No      If yes, when? **from:** \_\_\_\_/\_\_\_\_ (year/month if known)  
**until:** \_\_\_\_/\_\_\_\_ (year/month if known)

## 8. costs of medication

If you are currently taking medication, how high are the costs that you have to pay yourself through co-payments?

about \_\_\_\_\_ Euro/year.

I don't know.

## 9. general conditions of the treatment centre

How far is the centre treating your acromegaly from your home?

about \_\_\_\_\_ km

What are the approximate costs you incur for transport to the treating centre?

about \_\_\_\_\_ € per appointment

## 10. household income

How many people in total live in your household?

\_\_\_\_\_ people

What is your monthly net household income?

under 1000 €                       1000 € to under 2000 €                       2000 € to under 3000 €

3000 € to under 5000 €                       more than under 5000 €                       I don't know.



**Universitätsmedizin Essen**

Universitätsklinikum

Klinik für Neurochirurgie  
und Wirbelsäulenchirurgie

# Q2 - Questionnaire on current disease status

Dear patient,

the following questions relate to your current acromegaly symptoms and your IGF-1 levels. Please answer all questions completely and do not omit any questions.

Thank you very much for your participation!

## 1. current symptoms

### 1.1 How much do you CURRENTLY suffer from the following symptoms?

|                                     | not at all               | slightly                 | moderate                 | severe                   | very severe              |
|-------------------------------------|--------------------------|--------------------------|--------------------------|--------------------------|--------------------------|
| Nausea                              | <input type="checkbox"/> | <input type="checkbox"/> | <input type="checkbox"/> | <input type="checkbox"/> | <input type="checkbox"/> |
| Diabetes                            | <input type="checkbox"/> | <input type="checkbox"/> | <input type="checkbox"/> | <input type="checkbox"/> | <input type="checkbox"/> |
| High blood pressure                 | <input type="checkbox"/> | <input type="checkbox"/> | <input type="checkbox"/> | <input type="checkbox"/> | <input type="checkbox"/> |
| Depression                          | <input type="checkbox"/> | <input type="checkbox"/> | <input type="checkbox"/> | <input type="checkbox"/> | <input type="checkbox"/> |
| Carpal tunnel syndrome              | <input type="checkbox"/> | <input type="checkbox"/> | <input type="checkbox"/> | <input type="checkbox"/> | <input type="checkbox"/> |
| Limited concentration               | <input type="checkbox"/> | <input type="checkbox"/> | <input type="checkbox"/> | <input type="checkbox"/> | <input type="checkbox"/> |
| Memory difficulties                 | <input type="checkbox"/> | <input type="checkbox"/> | <input type="checkbox"/> | <input type="checkbox"/> | <input type="checkbox"/> |
| Daytime sleepiness                  | <input type="checkbox"/> | <input type="checkbox"/> | <input type="checkbox"/> | <input type="checkbox"/> | <input type="checkbox"/> |
| Increased sweating                  | <input type="checkbox"/> | <input type="checkbox"/> | <input type="checkbox"/> | <input type="checkbox"/> | <input type="checkbox"/> |
| Language change (sluggish language) | <input type="checkbox"/> | <input type="checkbox"/> | <input type="checkbox"/> | <input type="checkbox"/> | <input type="checkbox"/> |
| Enlargement of hands/feet           | <input type="checkbox"/> | <input type="checkbox"/> | <input type="checkbox"/> | <input type="checkbox"/> | <input type="checkbox"/> |
| Coarsening of the facial features   | <input type="checkbox"/> | <input type="checkbox"/> | <input type="checkbox"/> | <input type="checkbox"/> | <input type="checkbox"/> |
| Widening of the interdental spaces  | <input type="checkbox"/> | <input type="checkbox"/> | <input type="checkbox"/> | <input type="checkbox"/> | <input type="checkbox"/> |
| Increased organ size (heart)        | <input type="checkbox"/> | <input type="checkbox"/> | <input type="checkbox"/> | <input type="checkbox"/> | <input type="checkbox"/> |
| Visual disturbances                 | <input type="checkbox"/> | <input type="checkbox"/> | <input type="checkbox"/> | <input type="checkbox"/> | <input type="checkbox"/> |
| Joint pain                          | <input type="checkbox"/> | <input type="checkbox"/> | <input type="checkbox"/> | <input type="checkbox"/> | <input type="checkbox"/> |
| Headache                            | <input type="checkbox"/> | <input type="checkbox"/> | <input type="checkbox"/> | <input type="checkbox"/> | <input type="checkbox"/> |
| Swellings                           | <input type="checkbox"/> | <input type="checkbox"/> | <input type="checkbox"/> | <input type="checkbox"/> | <input type="checkbox"/> |

#### For women:

|                     | not at all               | slightly                 | moderate                 | severe                   | very severe              |
|---------------------|--------------------------|--------------------------|--------------------------|--------------------------|--------------------------|
| Menstrual disorders | <input type="checkbox"/> | <input type="checkbox"/> | <input type="checkbox"/> | <input type="checkbox"/> | <input type="checkbox"/> |
| Libido loss         | <input type="checkbox"/> | <input type="checkbox"/> | <input type="checkbox"/> | <input type="checkbox"/> | <input type="checkbox"/> |

#### For men

|                   |                          |                          |                          |                          |                          |
|-------------------|--------------------------|--------------------------|--------------------------|--------------------------|--------------------------|
| Libido loss       | <input type="checkbox"/> | <input type="checkbox"/> | <input type="checkbox"/> | <input type="checkbox"/> | <input type="checkbox"/> |
| Potency disorders | <input type="checkbox"/> | <input type="checkbox"/> | <input type="checkbox"/> | <input type="checkbox"/> | <input type="checkbox"/> |

Subjective symptomload

### 1.2 Do you currently have pain that you assume to be caused by acromegaly?

Yes       No

**1.3 On how many days per month do you have pain on average?**

about \_\_\_\_\_ days / month

**1.4 How severe is your pain on average?**

Please mark the perceived pain intensity between 0 and 10 on the following scale:

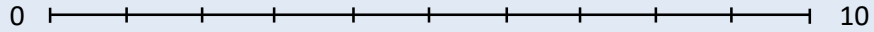

**2. IGF-1 values**

**2.1 How often is your IGF-1 level determined via a blood draw?**

about every \_\_\_\_\_ months

**2.2 When was the last time your IGF-1 level was determined via a blood sample?**

\_\_\_\_\_ / \_\_\_\_\_ (year/month if known)

**2.3 What was your IGF-1 value at the last measurement? (if known)**

too high

normal

too low

Exact value (if known): \_\_\_\_\_



**Universitätsmedizin Essen**

Universitätsklinikum

Klinik für Neurochirurgie  
und Wirbelsäulenchirurgie

# Q3 - Questionnaire on treatment adherence in acromegaly

Dear patient,

the following questions relate to the aftercare or drug therapy of your acromegaly disease. Please answer all questions completely and do not omit any questions.

Thank you very much for your participation!



## 1. Aftercare

### 1.1 How often do you go for endocrinological or neurosurgical follow-up?

- At least once a year, namely about \_\_\_\_\_ times/year.
- Less than once a year, namely about every \_\_\_\_\_ years.
- Not at all.

### 1.2 If you attend follow-up less than once a year, please give a reason (multiple answers possible):

|                                                                | fully agree              | rather agree             | neither nor              | rather not agree         | not agree at all         |
|----------------------------------------------------------------|--------------------------|--------------------------|--------------------------|--------------------------|--------------------------|
| I don't feel that it would be necessary.                       | <input type="checkbox"/> | <input type="checkbox"/> | <input type="checkbox"/> | <input type="checkbox"/> | <input type="checkbox"/> |
| I have too little time.                                        | <input type="checkbox"/> | <input type="checkbox"/> | <input type="checkbox"/> | <input type="checkbox"/> | <input type="checkbox"/> |
| I don't feel like it.                                          | <input type="checkbox"/> | <input type="checkbox"/> | <input type="checkbox"/> | <input type="checkbox"/> | <input type="checkbox"/> |
| I don't like going to the doctor.                              | <input type="checkbox"/> | <input type="checkbox"/> | <input type="checkbox"/> | <input type="checkbox"/> | <input type="checkbox"/> |
| I am afraid that I could be told that my illness has worsened. | <input type="checkbox"/> | <input type="checkbox"/> | <input type="checkbox"/> | <input type="checkbox"/> | <input type="checkbox"/> |
| The effort of time and / or cost is too high for me.           | <input type="checkbox"/> | <input type="checkbox"/> | <input type="checkbox"/> | <input type="checkbox"/> | <input type="checkbox"/> |

Other:

## 2. Medication

### 2.1 Have you EVER taken any of the following medication to treat acromegaly?

|                                                                   | Yes                      | No                       |
|-------------------------------------------------------------------|--------------------------|--------------------------|
| Somatostatin analogues (e.g. lanreotide, octreotide, pasireotide) | <input type="checkbox"/> | <input type="checkbox"/> |
| Dopamine agonists (e.g. cabergoline, bromocriptine)               | <input type="checkbox"/> | <input type="checkbox"/> |
| GH receptor antagonists (pegvisomant)                             | <input type="checkbox"/> | <input type="checkbox"/> |

Other:

**2.2 Have you been prescribed any medication to treat acromegaly that you should ACTUALLY take?**

|                                                                   | Yes                      | No                       |
|-------------------------------------------------------------------|--------------------------|--------------------------|
| Somatostatin analogues (e.g. lanreotide, octreotide, pasireotide) | <input type="checkbox"/> | <input type="checkbox"/> |
| Dopamine agonists (e.g. cabergoline, bromocriptine)               | <input type="checkbox"/> | <input type="checkbox"/> |
| GH receptor antagonists (pegvisomant)                             | <input type="checkbox"/> | <input type="checkbox"/> |

Other:

**2.3 Do you take the medication prescribed for you?  
Please only give details here for the medication that have CURRENTLY been prescribed for you (see question 2.2)!**

|                                                                   | Yes                      | No                       |
|-------------------------------------------------------------------|--------------------------|--------------------------|
| Somatostatin analogues (e.g. lanreotide, octreotide, pasireotide) | <input type="checkbox"/> | <input type="checkbox"/> |
| Dopamine agonists (e.g. cabergoline, bromocriptine)               | <input type="checkbox"/> | <input type="checkbox"/> |
| GH receptor antagonists (pegvisomant)                             | <input type="checkbox"/> | <input type="checkbox"/> |

Other:

**2.4 What is your motivation for taking the medication prescribed to you?  
(multiple answers possible)**

|                                                                        | fully agree              | rather agree             | neither nor              | rather not agree         | not agree at all         |
|------------------------------------------------------------------------|--------------------------|--------------------------|--------------------------|--------------------------|--------------------------|
| I take them because my doctor advises me to.                           | <input type="checkbox"/> | <input type="checkbox"/> | <input type="checkbox"/> | <input type="checkbox"/> | <input type="checkbox"/> |
| I take them because my physical performance has improved as a result.  | <input type="checkbox"/> | <input type="checkbox"/> | <input type="checkbox"/> | <input type="checkbox"/> | <input type="checkbox"/> |
| I take them because my cognitive performance has improved as a result. | <input type="checkbox"/> | <input type="checkbox"/> | <input type="checkbox"/> | <input type="checkbox"/> | <input type="checkbox"/> |
| I take them because as a result I have less pain.                      | <input type="checkbox"/> | <input type="checkbox"/> | <input type="checkbox"/> | <input type="checkbox"/> | <input type="checkbox"/> |

Other:

**2.5 Do you know the reason for the intake of your medication?**

- Yes
- No

**2.6 Do you know in what dosage you need to take of your medication?**

Yes

No

**2.7 Do you know how often you need to take your medication?**

Yes

No

**2.8 Do you always take your medication at the same time?**

**(Please tick only one answer)**

never     rarely     often     always

**2.9 Have you forgotten to take your medication in the last 4 weeks?**

**(Please tick only one answer)**

never     rarely     often     always

**2.10 Do you sometimes forget your medication at home when you are out?**

**(Please tick only one answer)**

never     rarely     often     always

**2.11 How important is it for you to take your medication regularly?**

**(Please tick only one answer)**

very important     rather important     rather unimportant     unimportant

**2.12 Do you sometimes intentionally skip taking a medication?**

**(Please tick only one answer)**

never     rarely     often     always

**2.13 Do you sometimes reduce the dosage of your medication?**

**(Please tick only one answer)**

never     rarely     often     always

Adherence score

**2.14 If you occasionally skip taking your medication or reduce the dosage, please state the reasons.**



**Universitätsmedizin Essen**

Universitätsklinikum

Klinik für Neurochirurgie  
und Wirbelsäulenchirurgie

# Q4 - Questionnaire on other diseases and complaints

Dear patient,

the following questions are about diseases that may coexist with your acromegaly disease. Please answer all questions completely and do not omit any questions.

Thank you very much for your participation!

**1. Are there any other diseases or physical complaints in addition to acromegaly?**

Yes     No (*continue with the next questionnaire*)

**If yes, what secondary disease(s) and their effects do you have?**

2. Is there a change in the sugar metabolism?     Yes     No (*continue with question 3*)

2.1 If yes, is there an insulin requirement?     Yes     No

2.2 If **not** insulin dependent, are you taking any other antidiabetic medication?     Yes     No

3. Do you have any of the following vascular or cardiac diseases? (*Multiple answers possible*)

High blood pressure                       Heart failure                       Heart valve defect

Cardiac arrhythmia

Other:

4. Do you have a lung or respiratory disease?

Yes     No (*continue with question 5*)

4.1 If yes, have you been diagnosed with sleep apnoea syndrome?     Yes     No

4.2 If yes, do you use a CPAP machine regularly?     Yes     No

4.3 What other disease(s) of the lungs or respiratory tract do you have?

5. Do you have any musculoskeletal disorders (muscles, bones, tendons, ligaments, joints)?

Yes     No (*continue with question 6*)

5.1 If yes, which disease(s) / complaints do you have?

6. Do you currently have or have you had a malignant disease (cancer) in the past?

Yes     No (*continue with question 7*)

6.1 Is the disease current or was it in the past?

current     The disease is no longer current, I am in remission.

6.2 When was the diagnosis made?

\_\_\_\_\_ / \_\_\_\_\_ (year/month if known)

6.3 Which malignant disease do you have?

7. Do you have a limitation of the field of vision?

Yes     No

8. Do you regularly suffer from headaches?

Yes     No (*continue with question 9*)

8.1 If yes, how many headache days do you have on average per month?

about \_\_\_\_\_ days / month

9. What medication do you take for your present symptoms (excluding medication you are taking as part of the acromegaly treatment)?

| Medication | Dosage | Since when<br>(month/ year) |
|------------|--------|-----------------------------|
|            |        |                             |
|            |        |                             |
|            |        |                             |
|            |        |                             |
|            |        |                             |
|            |        |                             |
|            |        |                             |



# Q5 - Questionnaire about the therapy of acromegaly

Dear Patient,

the following questions deal with the therapy of acromegaly and the perceived effects of the therapy on your physical and mental condition. Please answer all questions completely and do not omit any questions.

Thank you very much for your participation.



**1. How long have you been under medical treatment for your acromegaly disease?**

\_\_\_\_\_ / \_\_\_\_\_ (year/month if known)

**2. Did you interrupt the therapy at any time?**

Yes     No (*continue with question 3*)

2.1 If yes, how long did you interrupt the therapy?

1 year or shorter                       1-5 years                       longer than 5 years

2.2 If yes, what was the reason for the therapy interruption?

|                                                                                   | fully agree              | rather agree             | neither nor              | rather not agree         | not agree at all         |
|-----------------------------------------------------------------------------------|--------------------------|--------------------------|--------------------------|--------------------------|--------------------------|
| Lack of motivation                                                                | <input type="checkbox"/> | <input type="checkbox"/> | <input type="checkbox"/> | <input type="checkbox"/> | <input type="checkbox"/> |
| Dissatisfaction with the physician                                                | <input type="checkbox"/> | <input type="checkbox"/> | <input type="checkbox"/> | <input type="checkbox"/> | <input type="checkbox"/> |
| Organisational problem                                                            | <input type="checkbox"/> | <input type="checkbox"/> | <input type="checkbox"/> | <input type="checkbox"/> | <input type="checkbox"/> |
| Improvement of health condition, so that the therapy was not felt to be necessary | <input type="checkbox"/> | <input type="checkbox"/> | <input type="checkbox"/> | <input type="checkbox"/> | <input type="checkbox"/> |
| Deterioration of health so that it was not possible to attend appointments        | <input type="checkbox"/> | <input type="checkbox"/> | <input type="checkbox"/> | <input type="checkbox"/> | <input type="checkbox"/> |
| Dissatisfaction with the success of the therapy                                   | <input type="checkbox"/> | <input type="checkbox"/> | <input type="checkbox"/> | <input type="checkbox"/> | <input type="checkbox"/> |

Other:

**3. Overall, how successful do you experience your therapy?**

|                          |                          |                          |                          |                          |
|--------------------------|--------------------------|--------------------------|--------------------------|--------------------------|
| very successful          | successful               | moderate                 | of little success        | not successful at all    |
| <input type="checkbox"/> | <input type="checkbox"/> | <input type="checkbox"/> | <input type="checkbox"/> | <input type="checkbox"/> |

**4. Has your physical or mental (psychological) condition changed since you started therapy?**

|                                                                          | much better              | better                   | unchanged                | worsened                 | strongly worsened        |
|--------------------------------------------------------------------------|--------------------------|--------------------------|--------------------------|--------------------------|--------------------------|
| My physical condition since I started therapy has been ...               | <input type="checkbox"/> | <input type="checkbox"/> | <input type="checkbox"/> | <input type="checkbox"/> | <input type="checkbox"/> |
| My mental (psychological) condition since I started therapy has been ... | <input type="checkbox"/> | <input type="checkbox"/> | <input type="checkbox"/> | <input type="checkbox"/> | <input type="checkbox"/> |

**5. What specific changes have you noticed since you started therapy?**

|                                                                    | fully agree              | rather agree             | neither nor              | rather not agree         | not agree at all         |
|--------------------------------------------------------------------|--------------------------|--------------------------|--------------------------|--------------------------|--------------------------|
| I can accept the physical changes caused by acromegaly.            | <input type="checkbox"/> | <input type="checkbox"/> | <input type="checkbox"/> | <input type="checkbox"/> | <input type="checkbox"/> |
| I am more open about my disease.                                   | <input type="checkbox"/> | <input type="checkbox"/> | <input type="checkbox"/> | <input type="checkbox"/> | <input type="checkbox"/> |
| I can manage my everyday life better again.                        | <input type="checkbox"/> | <input type="checkbox"/> | <input type="checkbox"/> | <input type="checkbox"/> | <input type="checkbox"/> |
| I understand the disease and the changes it brings or has brought. | <input type="checkbox"/> | <input type="checkbox"/> | <input type="checkbox"/> | <input type="checkbox"/> | <input type="checkbox"/> |

Perceived beneficial effects

|                                                      |                          |                          |                          |                          |                          |
|------------------------------------------------------|--------------------------|--------------------------|--------------------------|--------------------------|--------------------------|
| I feel stressed by the doctor's appointments.        | <input type="checkbox"/> | <input type="checkbox"/> | <input type="checkbox"/> | <input type="checkbox"/> | <input type="checkbox"/> |
| Therapy takes up a lot of space in my everyday life. | <input type="checkbox"/> | <input type="checkbox"/> | <input type="checkbox"/> | <input type="checkbox"/> | <input type="checkbox"/> |
| I am burdened by taking the medication every day.    | <input type="checkbox"/> | <input type="checkbox"/> | <input type="checkbox"/> | <input type="checkbox"/> | <input type="checkbox"/> |
| I suffer from the side effects of the medication.    | <input type="checkbox"/> | <input type="checkbox"/> | <input type="checkbox"/> | <input type="checkbox"/> | <input type="checkbox"/> |

Perceived adverse effects

Other:



**Universitätsmedizin Essen**

Universitätsklinikum

Klinik für Neurochirurgie  
und Wirbelsäulenchirurgie

# Q6 - Questionnaire on doctor-patient communication

Dear patient,

the following questions are about the communication between you and your doctor in the context of treating your acromegaly. When answering the questions, please refer to the doctor you talk to most about your acromegaly. Please answer all questions completely and do not omit any questions.

Thank you very much for your participation.

**1. How well were you informed by your doctor about the following aspects related to your acromegaly disease?**

|                                                                                               | very good                | good                     | moderate                 | bad                      | very bad                 |
|-----------------------------------------------------------------------------------------------|--------------------------|--------------------------|--------------------------|--------------------------|--------------------------|
| Development of the disease                                                                    | <input type="checkbox"/> | <input type="checkbox"/> | <input type="checkbox"/> | <input type="checkbox"/> | <input type="checkbox"/> |
| Course of the disease                                                                         | <input type="checkbox"/> | <input type="checkbox"/> | <input type="checkbox"/> | <input type="checkbox"/> | <input type="checkbox"/> |
| Necessity of regular follow-up examinations                                                   | <input type="checkbox"/> | <input type="checkbox"/> | <input type="checkbox"/> | <input type="checkbox"/> | <input type="checkbox"/> |
| Possible effects on everyday life                                                             | <input type="checkbox"/> | <input type="checkbox"/> | <input type="checkbox"/> | <input type="checkbox"/> | <input type="checkbox"/> |
| Reasons for taking medication                                                                 | <input type="checkbox"/> | <input type="checkbox"/> | <input type="checkbox"/> | <input type="checkbox"/> | <input type="checkbox"/> |
| Possibilities to obtain further reliable information (literature, information brochures etc.) | <input type="checkbox"/> | <input type="checkbox"/> | <input type="checkbox"/> | <input type="checkbox"/> | <input type="checkbox"/> |
| Opportunities to participate in self-help groups                                              | <input type="checkbox"/> | <input type="checkbox"/> | <input type="checkbox"/> | <input type="checkbox"/> | <input type="checkbox"/> |
| Side effects of the medication                                                                | <input type="checkbox"/> | <input type="checkbox"/> | <input type="checkbox"/> | <input type="checkbox"/> | <input type="checkbox"/> |
| Therapy options                                                                               | <input type="checkbox"/> | <input type="checkbox"/> | <input type="checkbox"/> | <input type="checkbox"/> | <input type="checkbox"/> |

Education on acromegaly

**2. How would you assess the information and how it is communicated to you by your doctor?**

|                                                                                     | fully agree              | rather agree             | neither nor              | rather not agree         | not agree at all         |
|-------------------------------------------------------------------------------------|--------------------------|--------------------------|--------------------------|--------------------------|--------------------------|
| I have the feeling that my doctor takes enough time for me.                         | <input type="checkbox"/> | <input type="checkbox"/> | <input type="checkbox"/> | <input type="checkbox"/> | <input type="checkbox"/> |
| I always feel I can ask questions if I don't understand something.                  | <input type="checkbox"/> | <input type="checkbox"/> | <input type="checkbox"/> | <input type="checkbox"/> | <input type="checkbox"/> |
| The amount of information is just right to understand everything.                   | <input type="checkbox"/> | <input type="checkbox"/> | <input type="checkbox"/> | <input type="checkbox"/> | <input type="checkbox"/> |
| After the diagnosis, I was emotionally stable enough to understand the information. | <input type="checkbox"/> | <input type="checkbox"/> | <input type="checkbox"/> | <input type="checkbox"/> | <input type="checkbox"/> |

Quality of information provision

|                                                                                                                     | fully agree              | rather agree             | neither nor              | rather not agree         | not agree at all         |
|---------------------------------------------------------------------------------------------------------------------|--------------------------|--------------------------|--------------------------|--------------------------|--------------------------|
| The information is explained in simple, easy-to-understand terms.                                                   | <input type="checkbox"/> | <input type="checkbox"/> | <input type="checkbox"/> | <input type="checkbox"/> | <input type="checkbox"/> |
| My doctor asks if I am getting enough information.                                                                  | <input type="checkbox"/> | <input type="checkbox"/> | <input type="checkbox"/> | <input type="checkbox"/> | <input type="checkbox"/> |
| I have the feeling that my doctor assumes that I already have enough information and therefore explains too little. | <input type="checkbox"/> | <input type="checkbox"/> | <input type="checkbox"/> | <input type="checkbox"/> | <input type="checkbox"/> |
| I have understood the information.                                                                                  | <input type="checkbox"/> | <input type="checkbox"/> | <input type="checkbox"/> | <input type="checkbox"/> | <input type="checkbox"/> |
| I feel sufficiently informed by the information.                                                                    | <input type="checkbox"/> | <input type="checkbox"/> | <input type="checkbox"/> | <input type="checkbox"/> | <input type="checkbox"/> |
| My doctor uses specialist terminology to an appropriate and understandable extent.                                  | <input type="checkbox"/> | <input type="checkbox"/> | <input type="checkbox"/> | <input type="checkbox"/> | <input type="checkbox"/> |

Quality of information provision

**3. How did you obtain further information outside the conversation with your doctor?**

Internet                       Networking with other affected people                       No further information obtained at all

Information brochure                       (Text)books

Other:

**4. How long does it usually take to talk to your doctor at a routine appointment?**

less than 5 minutes                       between 5 and 10 minutes

between 10 and 20 minutes                       more than 20 minutes

**4.1 Do you feel that this duration is appropriate?**

far too long                      a little too long                      just right                      a little too short                      far too short

**5. How well did your doctor discuss the following aspects of a potentially expected therapy success with you before starting the therapy?**

|                                            | very good                | good                     | moderate                 | bad                      | very bad                 |
|--------------------------------------------|--------------------------|--------------------------|--------------------------|--------------------------|--------------------------|
| Improvement of hormone levels              | <input type="checkbox"/> | <input type="checkbox"/> | <input type="checkbox"/> | <input type="checkbox"/> | <input type="checkbox"/> |
| Improvement of physical complaints         | <input type="checkbox"/> | <input type="checkbox"/> | <input type="checkbox"/> | <input type="checkbox"/> | <input type="checkbox"/> |
| Reduction of psychological complaints      | <input type="checkbox"/> | <input type="checkbox"/> | <input type="checkbox"/> | <input type="checkbox"/> | <input type="checkbox"/> |
| Reduction of restrictions in everyday life | <input type="checkbox"/> | <input type="checkbox"/> | <input type="checkbox"/> | <input type="checkbox"/> | <input type="checkbox"/> |

**6) How well does your doctor discuss the actual course of therapy with you during the therapy?**

| very good                | good                     | moderate                 | bad                      | very bad                 |
|--------------------------|--------------------------|--------------------------|--------------------------|--------------------------|
| <input type="checkbox"/> | <input type="checkbox"/> | <input type="checkbox"/> | <input type="checkbox"/> | <input type="checkbox"/> |

**7. How well did your doctor explain to you that you will need permanent follow-up care (follow-up appointments and, if necessary, medication) after the therapy has taken place?**

| very good                | good                     | moderate                 | bad                      | very bad                 |
|--------------------------|--------------------------|--------------------------|--------------------------|--------------------------|
| <input type="checkbox"/> | <input type="checkbox"/> | <input type="checkbox"/> | <input type="checkbox"/> | <input type="checkbox"/> |

**8. How well did your doctor explain to you the reasons why it is so important that you follow the recommendations for treatment that have been agreed upon (attend follow-up appointments, take medication according to plan)?**

| very good                | good                     | moderate                 | bad                      | very bad                 |
|--------------------------|--------------------------|--------------------------|--------------------------|--------------------------|
| <input type="checkbox"/> | <input type="checkbox"/> | <input type="checkbox"/> | <input type="checkbox"/> | <input type="checkbox"/> |

**9. How well does your doctor deal with possible difficulties in implementing the treatment recommendations (follow-up appointments and taking medication)?**

| very good                | good                     | moderate                 | bad                      | very bad                 |
|--------------------------|--------------------------|--------------------------|--------------------------|--------------------------|
| <input type="checkbox"/> | <input type="checkbox"/> | <input type="checkbox"/> | <input type="checkbox"/> | <input type="checkbox"/> |



**Universitätsmedizin Essen**

Universitätsklinikum

Klinik für Neurochirurgie  
und Wirbelsäulenchirurgie

# Q7 - Questionnaire on the perceived therapy needs

Dear patient,

the following questions deal with the personal assessment of your need for therapy as well as your expectations and wishes with regard to therapy. Please answer all questions completely and do not omit any questions.

Thank you very much for your participation.

**1. What is your own estimation of the need for medical therapy in regard to your acromegaly disease?**

- no need     
  low demand     
  average demand     
  high demand     
  very high demand

1.1 Please give reasons for your assessment.

|                                                                            | fully agree              | rather agree             | neither nor              | rather not agree         | not agree at all         |
|----------------------------------------------------------------------------|--------------------------|--------------------------|--------------------------|--------------------------|--------------------------|
| My physical condition is good at the moment.                               | <input type="checkbox"/> | <input type="checkbox"/> | <input type="checkbox"/> | <input type="checkbox"/> | <input type="checkbox"/> |
| My mental state is good at the moment.                                     | <input type="checkbox"/> | <input type="checkbox"/> | <input type="checkbox"/> | <input type="checkbox"/> | <input type="checkbox"/> |
| Others are worse off than me and need treatment more urgently.             | <input type="checkbox"/> | <input type="checkbox"/> | <input type="checkbox"/> | <input type="checkbox"/> | <input type="checkbox"/> |
| The therapy doesn't bring any change anyway, so I might as well not do it. | <input type="checkbox"/> | <input type="checkbox"/> | <input type="checkbox"/> | <input type="checkbox"/> | <input type="checkbox"/> |

Other:

**2a. What are your expectations of the medical treatment of your acromegaly disease?**

|                                                                                      | fully agree              | rather agree             | neither nor              | rather not agree         | not agree at all         |
|--------------------------------------------------------------------------------------|--------------------------|--------------------------|--------------------------|--------------------------|--------------------------|
| I expect the treatment to improve my performance in everyday life.                   | <input type="checkbox"/> | <input type="checkbox"/> | <input type="checkbox"/> | <input type="checkbox"/> | <input type="checkbox"/> |
| I expect the treatment to alleviate my physical discomfort.                          | <input type="checkbox"/> | <input type="checkbox"/> | <input type="checkbox"/> | <input type="checkbox"/> | <input type="checkbox"/> |
| I expect the treatment to improve my psychological well-being.                       | <input type="checkbox"/> | <input type="checkbox"/> | <input type="checkbox"/> | <input type="checkbox"/> | <input type="checkbox"/> |
| I expect a quick success of the therapy.                                             | <input type="checkbox"/> | <input type="checkbox"/> | <input type="checkbox"/> | <input type="checkbox"/> | <input type="checkbox"/> |
| I expect that the medication will prevent the need for pituitary surgery.            | <input type="checkbox"/> | <input type="checkbox"/> | <input type="checkbox"/> | <input type="checkbox"/> | <input type="checkbox"/> |
| I expect to have to take less medication in the future as a result of the treatment. | <input type="checkbox"/> | <input type="checkbox"/> | <input type="checkbox"/> | <input type="checkbox"/> | <input type="checkbox"/> |

Positive treatment expectations



|                                                                                          | fully agree              | rather agree             | neither nor              | rather not agree         | not agree at all         |
|------------------------------------------------------------------------------------------|--------------------------|--------------------------|--------------------------|--------------------------|--------------------------|
| I expect to have fewer doctor's appointments in the future as a result of the treatment. | <input type="checkbox"/> | <input type="checkbox"/> | <input type="checkbox"/> | <input type="checkbox"/> | <input type="checkbox"/> |

Positive treatment expectations

Other expectations:

**2b. What wishes do you have for the medical treatment of your acromegaly disease?**

|                                                                                                 | fully agree              | rather agree             | neither nor              | rather not agree         | not agree at all         |
|-------------------------------------------------------------------------------------------------|--------------------------|--------------------------|--------------------------|--------------------------|--------------------------|
| I want to be treated by an expert.                                                              | <input type="checkbox"/> | <input type="checkbox"/> | <input type="checkbox"/> | <input type="checkbox"/> | <input type="checkbox"/> |
| I want to have a constant doctor to refer to and not be treated by constantly changing doctors. | <input type="checkbox"/> | <input type="checkbox"/> | <input type="checkbox"/> | <input type="checkbox"/> | <input type="checkbox"/> |
| I would like to be fully informed about the treatment and treatment options.                    | <input type="checkbox"/> | <input type="checkbox"/> | <input type="checkbox"/> | <input type="checkbox"/> | <input type="checkbox"/> |
| I want to be involved in the decision about the therapy.                                        | <input type="checkbox"/> | <input type="checkbox"/> | <input type="checkbox"/> | <input type="checkbox"/> | <input type="checkbox"/> |
| I would like the doctor to have enough time and patience to answer my questions.                | <input type="checkbox"/> | <input type="checkbox"/> | <input type="checkbox"/> | <input type="checkbox"/> | <input type="checkbox"/> |

Other wishes:

### 2c. What concerns do you have about the medical treatment of your acromegaly disease?

|                                                                                            | fully agree              | rather agree             | neither nor              | rather not agree         | not agree at all         |
|--------------------------------------------------------------------------------------------|--------------------------|--------------------------|--------------------------|--------------------------|--------------------------|
| I am worried that the treatment will not work.                                             | <input type="checkbox"/> | <input type="checkbox"/> | <input type="checkbox"/> | <input type="checkbox"/> | <input type="checkbox"/> |
| I am worried that the treatment will not bring the improvement I hope for.                 | <input type="checkbox"/> | <input type="checkbox"/> | <input type="checkbox"/> | <input type="checkbox"/> | <input type="checkbox"/> |
| I am worried that the treatment will make my symptoms and limitations worse.               | <input type="checkbox"/> | <input type="checkbox"/> | <input type="checkbox"/> | <input type="checkbox"/> | <input type="checkbox"/> |
| I am worried that I will get unpleasant side effects from the medication.                  | <input type="checkbox"/> | <input type="checkbox"/> | <input type="checkbox"/> | <input type="checkbox"/> | <input type="checkbox"/> |
| I am worried that the treatment will take up a lot of time and determine my everyday life. | <input type="checkbox"/> | <input type="checkbox"/> | <input type="checkbox"/> | <input type="checkbox"/> | <input type="checkbox"/> |

Negative treatment expectations

Other concerns:

### 3. How do you currently rate the extent of your acromegaly disease?

|                                                                  | fully agree              | rather agree             | neither nor              | rather not agree         | not agree at all         |
|------------------------------------------------------------------|--------------------------|--------------------------|--------------------------|--------------------------|--------------------------|
| I have a serious illness.                                        | <input type="checkbox"/> | <input type="checkbox"/> | <input type="checkbox"/> | <input type="checkbox"/> | <input type="checkbox"/> |
| I attribute my physical impairments to my acromegaly disease.    | <input type="checkbox"/> | <input type="checkbox"/> | <input type="checkbox"/> | <input type="checkbox"/> | <input type="checkbox"/> |
| I attribute my mental impairments to my acromegaly disease.      | <input type="checkbox"/> | <input type="checkbox"/> | <input type="checkbox"/> | <input type="checkbox"/> | <input type="checkbox"/> |
| My acromegaly disease causes clearly noticeable symptoms for me. | <input type="checkbox"/> | <input type="checkbox"/> | <input type="checkbox"/> | <input type="checkbox"/> | <input type="checkbox"/> |
| My acromegaly disease is a big burden for me.                    | <input type="checkbox"/> | <input type="checkbox"/> | <input type="checkbox"/> | <input type="checkbox"/> | <input type="checkbox"/> |
